# Supplementary material for: Decoding gripping force based on local field potentials recorded from subthalamic nucleus in humans
Source: eLife. 2016 Nov 18;5:e19089. doi: 10.7554/eLife.19089 (PMC5148608; doi:10.7554/eLife.19089)
Supplement: Figure 2—source data 1. — It contains data about median WithinR and the normalized RMSE when different models were used for force prediction, as well as the average power modulations at the beta band and gamma band for each STN that was recorded in the main paradigm and used for the analysis. DOI: http://dx.doi.org/10.7554/eLife.19089.008 [file elife-19089-fig2-data1.xlsx]

## Sheet: WithinR
	Mod1_Low	Mod2_Low	Mod3_Low	Mod4_Low	Mod5_Low	Mod6_Low	Mod7_Low	Mod8_Low	Mod1_High	Mod2_High	Mod3_High	Mod4_High	Mod5_High	Mod6_High	Mod7_High	Mod8_High
ID01	0.928319	0.937899	0.933511	0.939575	0.976128	0.979157	0.918318	0.918593	0.978554	0.991775	0.452954	0.93285	0.993413	0.974331	0.945449	0.960085
ID02	0.980048	0.94771	0.972082	0.944646	0.949893	0.663724	0.884863	0.945962	0.929654	0.952777	0.932707	0.908657	0.877043	0.72481	0.844091	0.952242
ID03	0.992906	0.986643	0.893646	0.979071	0.990953	-0.332759	0.993657	0.871757	0.982917	0.96875	0.984407	0.985432	0.975517	0.664957	0.9916	0.864996
ID04	0.945995	0.977526	0.879856	0.928265	0.954931	-0.627497	0.932227	0.619452	0.947142	0.979475	0.621843	0.909096	0.875238	0.161029	0.987521	0.763788
ID05	0.903571	0.90197	0.915382	0.913214	0.928763	-0.264077	0.915744	0.745189	0.972988	0.97483	0.972579	0.862485	0.878779	0.724802	0.977132	0.884039
ID06	0.937674	0.952076	0.903901	0.846481	0.902331	0.906673	0.888008	0.972162	0.983187	0.976173	0.987119	0.894435	0.600669	0.73831	0.988327	0.973172
ID07	0.963824	0.91488	0.946411	0.97268	-0.0445902	0.69575	0.962824	0.892047	0.981697	0.920823	0.915404	0.980886	0.970849	0.0653308	0.982398	0.894795
ID08	0.929993	0.953961	0.740227	0.900895	0.314493	-0.604229	0.259861	0.412001	0.951966	0.956306	0.913457	0.951922	0.837013	0.747265	0.934595	0.933929
ID09	0.961322	0.970654	0.970076	0.956076	0.869979	0.562692	0.926992	0.970513	0.963824	0.932125	0.974075	0.821367	0.652036	0.680505	0.982739	0.834803

## Sheet: nRMSE
	Mod1_Low	Mod2_Low	Mod3_Low	Mod4_Low	Mod5_Low	Mod6_Low	Mod7_Low	Mod8_Low	Mod1_High	Mod2_High	Mod3_High	Mod4_High	Mod5_High	Mod6_High	Mod7_High	Mod8_High
ID01	6.08504	5.85392	5.41785	5.64702	9.43931	19.4121	12.7217	11.3092	27.6966	16.381	29.0758	51.5556	56.5022	92.3995	67.0585	22.091
ID02	34.7653	16.6024	19.1609	41.2238	32.0646	18.3821	32.4827	18.4371	28.7291	23.8298	35.8645	54.6325	73.0509	72.1475	68.2506	20.45
ID03	9.99227	28.8952	16.1937	14.1044	13.02	58.044	45.7906	27.8959	17.3362	20.9891	23.8904	32.3836	45.7575	62.408	24.5327	34.7967
ID04	10.0571	11.4559	30.5538	10.0482	17.0533	28.1158	10.6017	19.5829	14.5381	10.4847	8.09899	18.566	38.1554	28.8715	40.8493	15.7247
ID05	20.6348	18.4555	24.8495	21.3628	19.9259	34.6243	20.602	23.6707	26.7445	22.2641	20.383	26.102	17.1223	41.7788	29.7635	30.4925
ID06	14.2338	10.8376	14.5097	14.3205	14.3385	24.2463	14.5011	12.2576	12.5814	13.8514	28.7323	57.5669	60.6261	27.5299	67.2093	54.3369
ID07	34.7653	16.6024	19.1609	41.2238	32.0646	18.3821	32.4827	18.4371	20.4709	18.5984	17.2465	60.2763	60.2763	64.1402	48.8001	31.0208
ID08	23.2235	17.3909	23.9438	21.5324	76.2775	60.1917	21.2238	22.0121	20.7617	16.2264	19.6456	17.9513	17.2734	17.9948	19.0519	7.83874
ID09	12.7907	13.1242	24.1475	28.6286	32.8723	47.3118	41.8676	24.2434	28.3521	20.4303	29.9732	35.5646	29.9055	31.5092	30.5662	43.7618

## Sheet: Fig3
	WithinR	StableR	Gama	Beta
ID01	0.835165	0.481201	46.217	-6.56436
ID02	0.745635	0.680534	15.6907	-3.09071
ID03	0.790538	0.515385	3.79096	-10.8009
ID04	0.467269	0.448165	0.367431	-10.8223
ID05	0.619775	0.694398	3.09852	-44.9083
ID06	0.737133	0.703377	4.66556	-34.1546
ID07	0.851484	0.768067	31.9931	-12.7199
ID08	0.883656	0.771429	34.0395	-16.7842
ID09	0.445039	0.913654	19.6764	-41.5195
ID10	0.290906	0.0868358	-3.07103	-5.87885
ID11	0.360557	0.0344938	-1.38145	-18.6432
ID12	0.116103	0.184859	-0.696683	-12.1679
